# Supplementary material for: The Dot1 Histone Methyltransferase and the Rad9 Checkpoint Adaptor Contribute to Cohesin-Dependent Double-Strand Break Repair by Sister Chromatid Recombination in Saccharomyces cerevisiae
Source: Oxford University Press journal article supplement (doi:10.1534/genetics.109.101899), 2009-03-31
Supplement: figure_s1.pdf [file figure_s1.pdf]

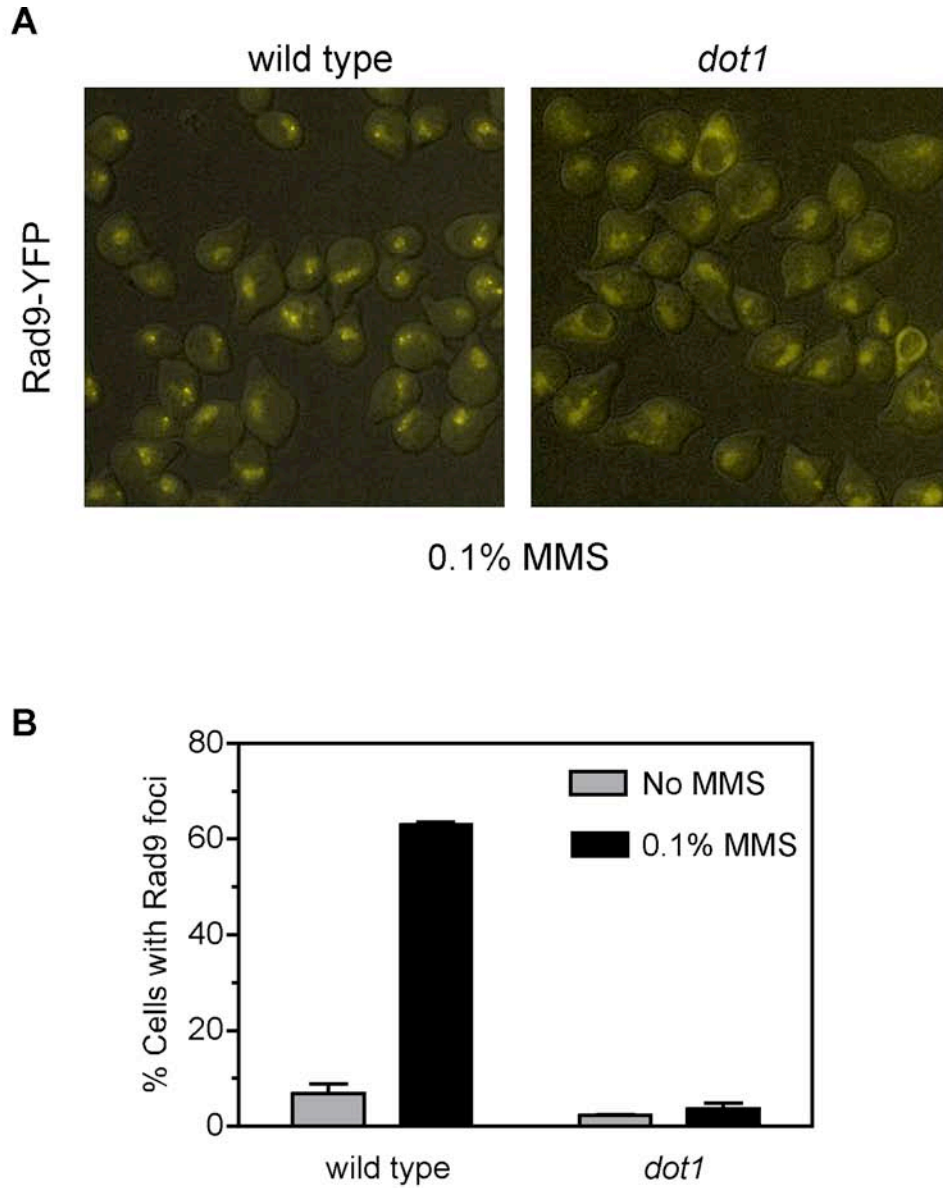

FIGURE S1.—Formation of MMS-induced Rad9 foci is impaired in the *dot1* mutant. (A) Deconvoluted fluorescence microscopy images of Rad9-YFP foci in wild type (W4638-2C) and *dot1* (YP759) cells arrested in G1 with  $\alpha$ -factor and treated with 0.1% MMS for one hour. To outline the contour of the cells, an overlay of the Differential Interference Contrast (DIC) image with 10% transparency over the YFP image is shown. (B) The percentage of cells containing Rad9-YFP foci before and after MMS treatment is represented. Average and standard deviation of two independent experiments are shown. Between 300-500 cells were scored for each strain in each experiment.
