# Supplementary material for: The Dot1 Histone Methyltransferase and the Rad9 Checkpoint Adaptor Contribute to Cohesin-Dependent Double-Strand Break Repair by Sister Chromatid Recombination in Saccharomyces cerevisiae
Source: Oxford University Press journal article supplement (doi:10.1534/genetics.109.101899), 2009-03-31
Supplement: figure_s2.pdf [file figure_s2.pdf]

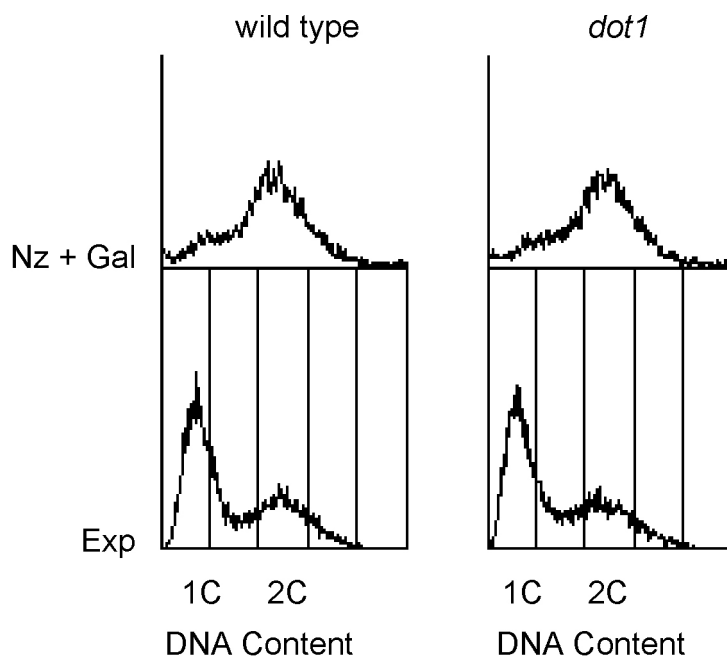

FIGURE S2.—FACS analysis of the DNA content of wild-type (CCG2876) and *dot1* (YP960) cells incubated under the conditions described in Figure 6 for ChIP analysis of Scc1 recruitment to the regions flanking a DSB at *MAT*. Exp: cells growing exponentially in glycerol-lactate. Nz + Gal: nocodazole-treated cells incubated in galactose for 4 hours to induce the HO cut.
