# Supplementary material for: The Dot1 Histone Methyltransferase and the Rad9 Checkpoint Adaptor Contribute to Cohesin-Dependent Double-Strand Break Repair by Sister Chromatid Recombination in Saccharomyces cerevisiae
Source: Oxford University Press journal article supplement (doi:10.1534/genetics.109.101899), 2009-03-31
Supplement: figure_s3.pdf [file figure_s3.pdf]

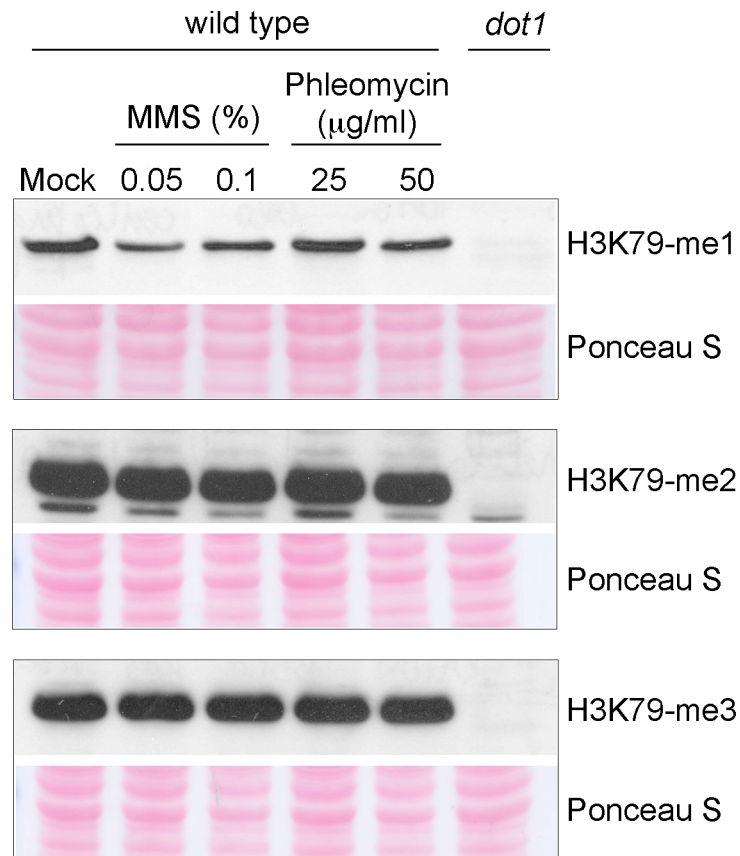

FIGURE S3.—The state of histone H3K79 methylation does not change upon global DNA damage. Wild-type cells were mock treated or treated for 1 hour with 0.05% or 0.1% MMS or with 25  $\mu\text{g/ml}$  or 50  $\mu\text{g/ml}$  of phleomycin, as indicated. Cell extracts were analyzed by western blot with antibodies that specifically recognize the mono-, di- or tri-methylated histone H3K79 (-me1, -me2 or -me3, respectively). The *dot1* mutant, which lacks H3K79 methylation, is included as a control. Staining of the membrane with Ponceau S is shown as a loading control.
